# Supplementary material for: Phosphole modified pentathienoacene: Synthesis, electronic properties and self-assembly
Source: Royal Society of Chemistry journal article supplement (doi:10.1039/c1ob06584j), 2011-11-22

Electronic Supplementary Information (ESI) for article “*Phosphole Modified Pentathienoacene: Synthesis, Electronic Properties and Self-Assembly*” by Jun-Hua Wan,\* Wei-Fen Fang, Yi-Bao Li, Xu-Qiong Xiao, Li-Hong Zhang, Zheng Xu, Jia-Jian Peng, Guo-Qiao Lai\*

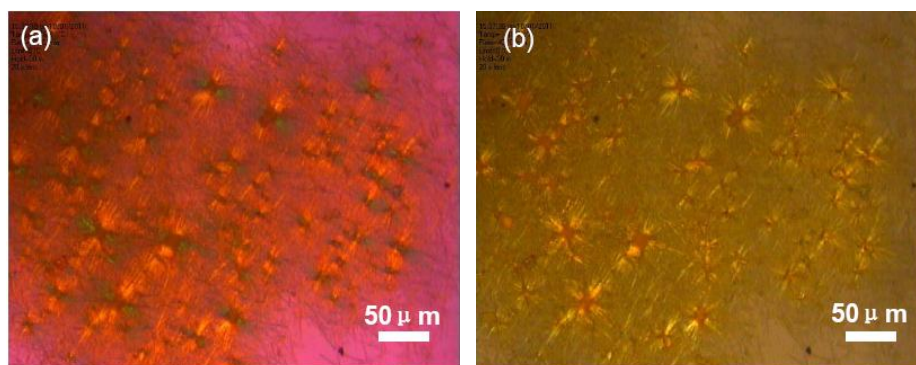

Fig. S1. (a) POM images (b) OM images of xerogel formed from **6** in actone (6 mg/mL).

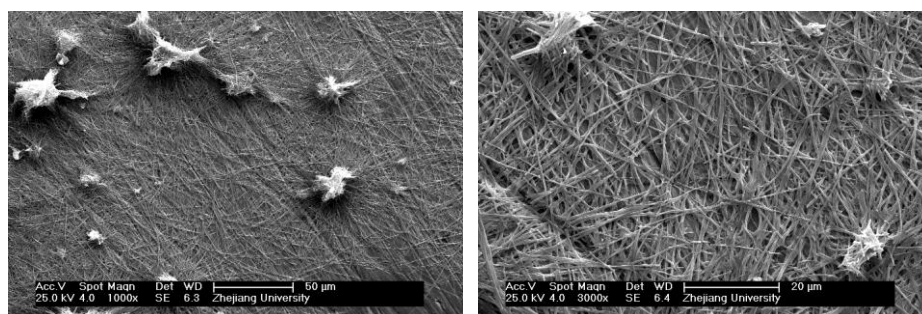

Fig. S2. FE-SEM images of xerogel formed from **6** in acetone (6 mg/mL).

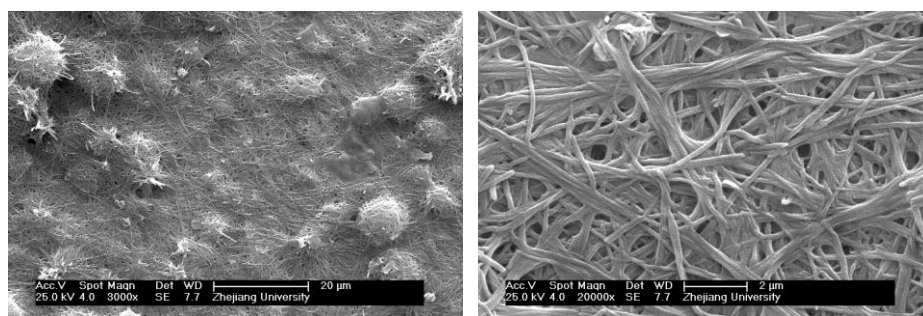

Fig. S2. FE-SEM images of xerogel formed from **6** in ethyl acetate (7 mg/mL).

The  $^1\text{H}$  NMR spectra for **3a**, **3b**, **5** and **6**.

### $^1\text{H}$ NMR Spectra

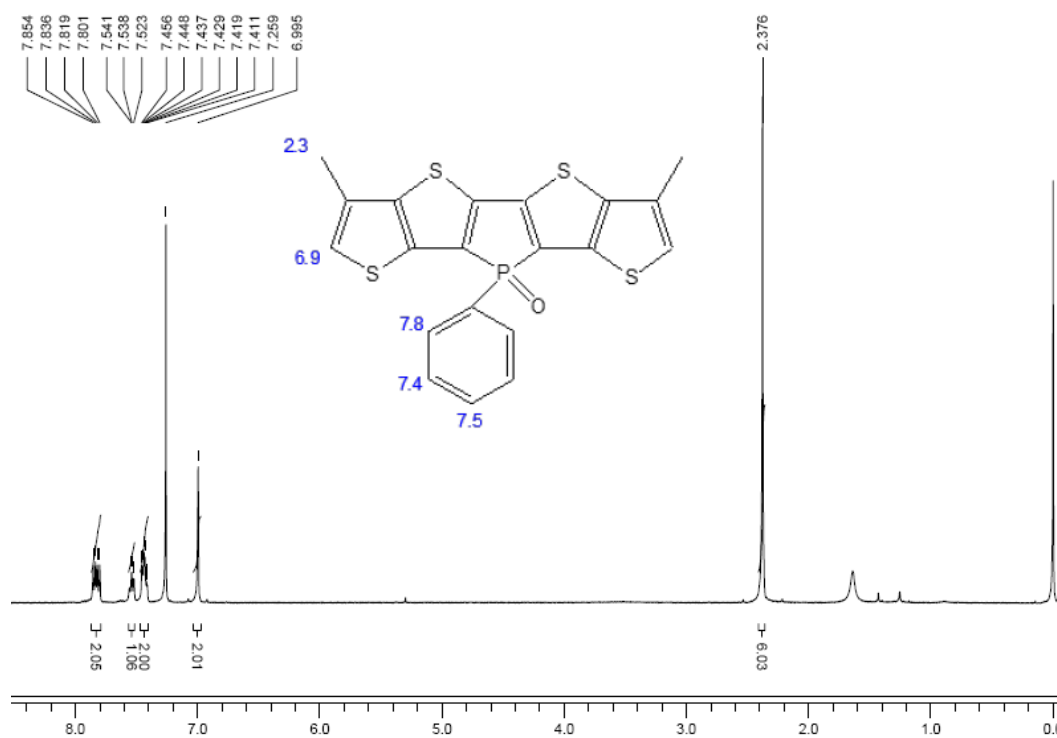

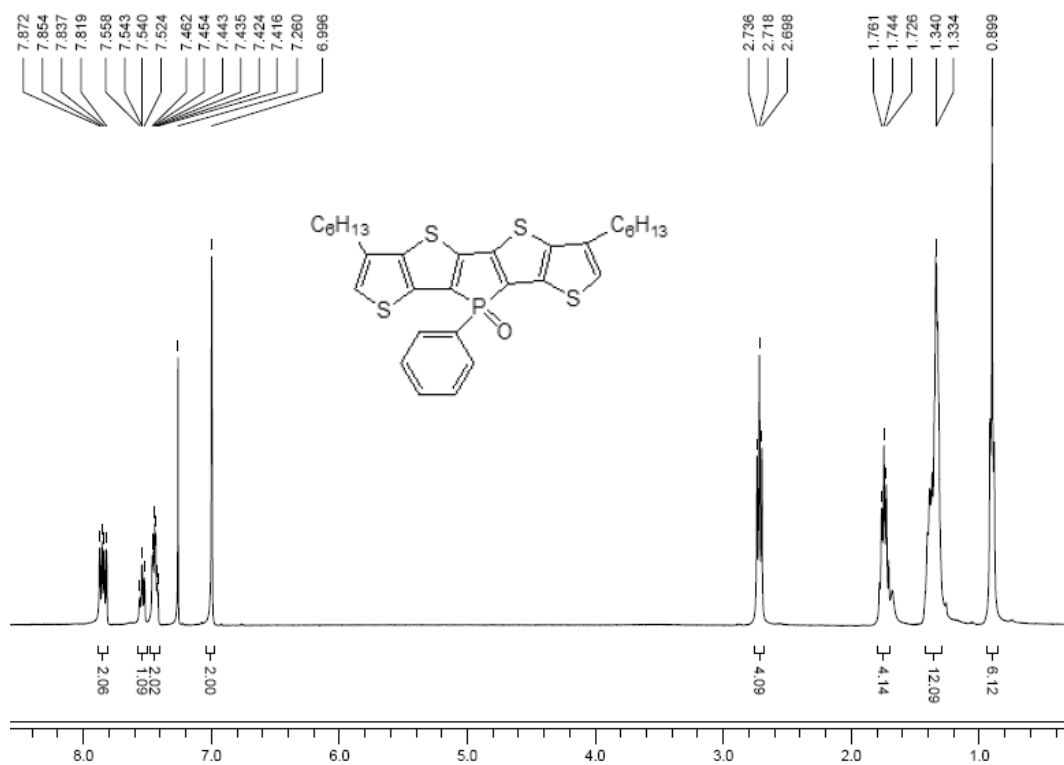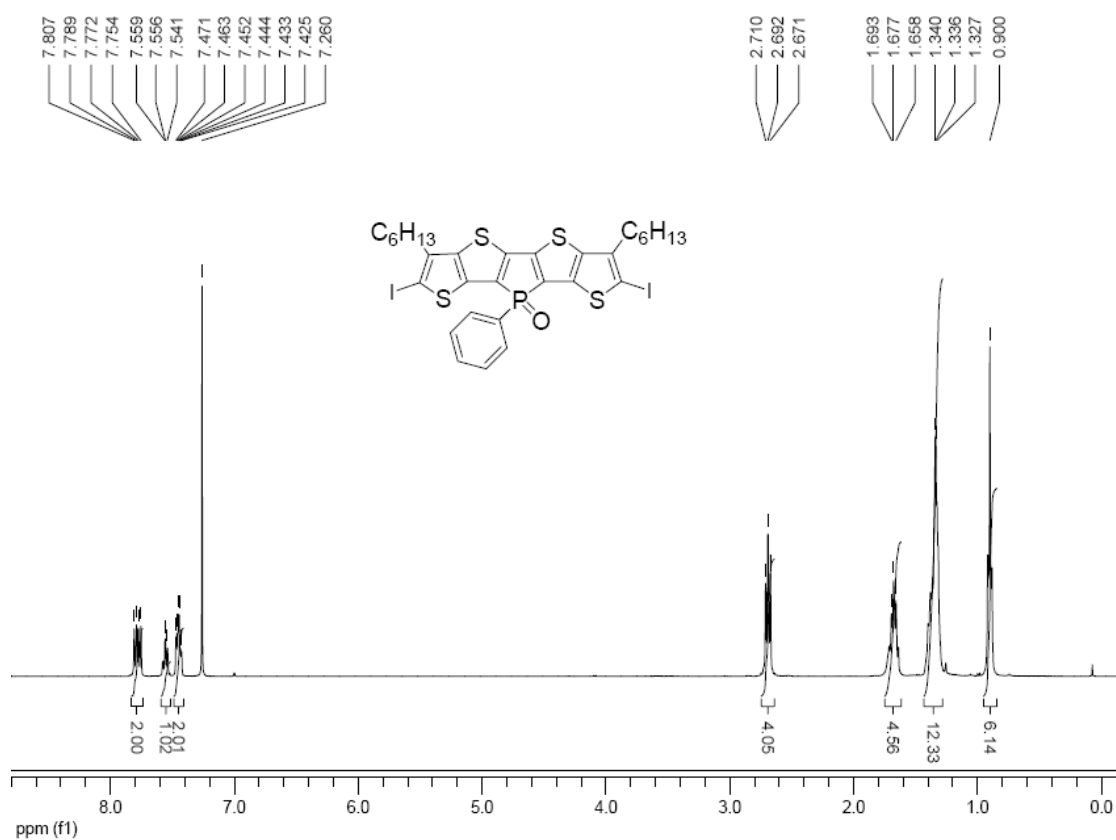

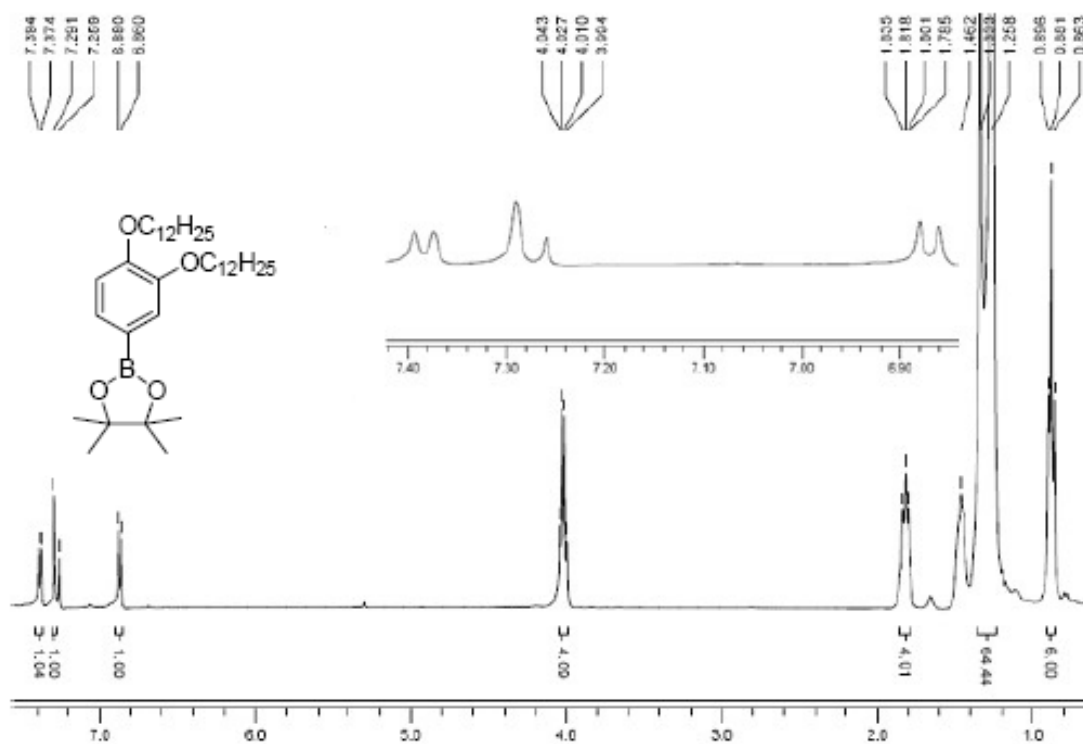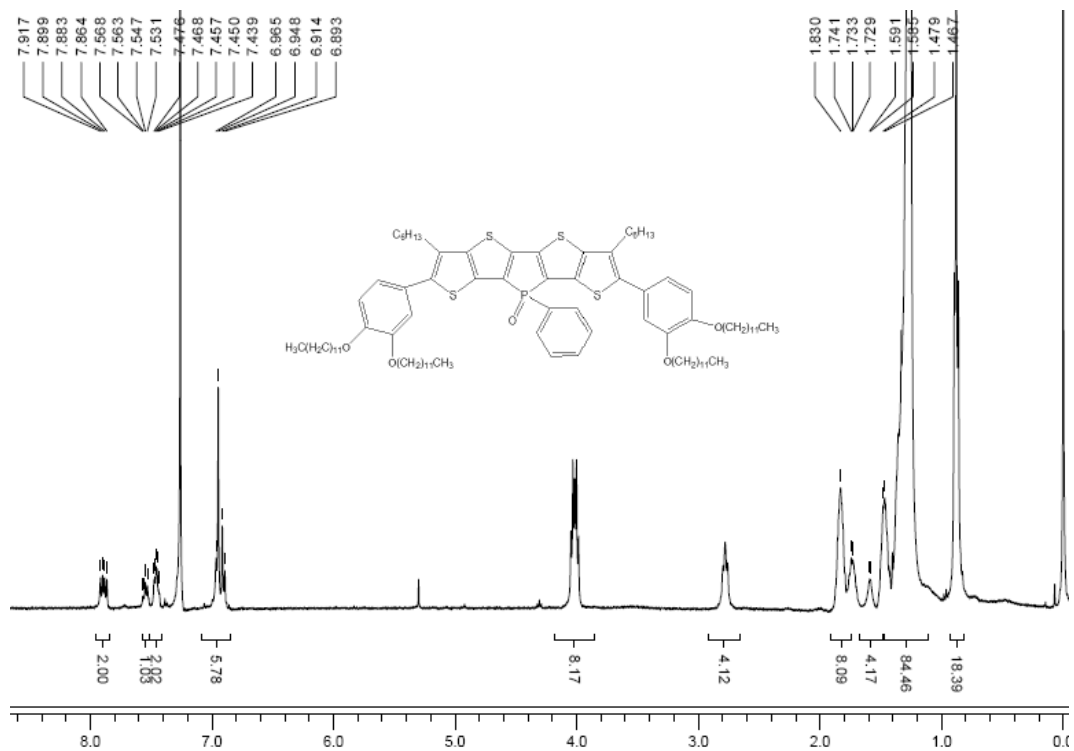

Supplement: c1ob06584j.pdf [file c1ob06584j.pdf]
